# Supplementary material
Source: PubMed Central journal article supplement (PMC3381234)
Supplement: supp_185.12.1307_Mikkelsen_ODS.pdf [file supp_185.12.1307_Mikkelsen_ODS.pdf]

**TITLE:** THE ARDS COGNITIVE OUTCOMES STUDY (ACOS): LONG-TERM NEUROPSYCHOLOGICAL FUNCTION IN ACUTE LUNG INJURY SURVIVORS

**Authors:**

Mark E. Mikkelsen, M.D., M.S.<sup>1,2\*</sup>  
Jason D. Christie, M.D., M.S.<sup>1,2\*</sup>  
Paul N. Lancken, M.D.<sup>1</sup>  
Rosette C. Biester, Ph.D.<sup>3</sup>  
B. Taylor Thompson, M.D.<sup>4</sup>  
Scarlett L. Bellamy, Sc.D.<sup>2</sup>  
A. Russell Localio, Ph.D.<sup>2</sup>  
Ejigayehu Demissie, M.S.N.<sup>1,2</sup>  
Ramona O. Hopkins, Ph.D.<sup>5,6</sup>  
Derek C. Angus, M.D., M.P.H.<sup>7</sup>

\* These authors contributed equally to this work

**Institution:** <sup>1</sup>Pulmonary, Allergy, and Critical Care Division  
Department of Medicine  
University of Pennsylvania School of Medicine  
<sup>2</sup>Center for Clinical Epidemiology and Biostatistics  
University of Pennsylvania School of Medicine  
<sup>3</sup>Department of Physical Medicine and Rehabilitation  
University of Pennsylvania School of Medicine  
Philadelphia Veterans Affairs Medical Center  
<sup>4</sup>Pulmonary and Critical Care Unit, Department of Medicine  
Massachusetts General Hospital  
<sup>5</sup>Department of Medicine, Pulmonary and Critical Care Division,  
Intermountain Medical Center  
<sup>6</sup> Psychology Department and Neuroscience Center,  
Brigham Young University  
<sup>7</sup>CRISMA Center, Department of Critical Care Medicine and  
Department of Health Policy and Management  
University of Pittsburgh

**Running Head:** ARDS COGNITIVE OUTCOMES STUDY (ACOS)

**Descriptor:** 4.2 ALI/ARDS: Diagnosis & Clinical Issues

## **Online Data Supplement**

### **Methods**

The study was reviewed and approved by the Institutional Review Boards of each participating hospital. It was also approved by the Natural History and Steering Committees of the NIH National Heart, Lung, and Blood Institute (NHLBI) Acute Respiratory Distress Syndrome Clinical Trials Network (ARDSNet) in 2002.

### *Study Design*

The ARDS Cognitive Outcomes Study (ACOS) is a prospective, multi-center cohort study of survivors from the ARDSNet Fluid and Catheter Treatment Trial (FACTT). FACTT enrolled patients from 38 North American hospitals between June 2000 and October 2005. Between July 2002 and July 2003, FACTT was halted and new regulatory approval related to the study was prohibited. ACOS was coordinated and executed by investigators at the University of Pennsylvania and University of Pittsburgh. The regulatory process for ACOS began prior to the halt and testing was conducted between March 2003 and September 2006 in concert with the Economic Analysis of the Pulmonary-Artery Catheter (EA-PAC) study as a planned long-term assessment of neuropsychological function in FACTT survivors (E1). As a consequence of the regulatory halt of FACTT, ACOS ran partially concurrent with FACTT. Subjects gave informed consent for the telephone administration of neuropsychological tests.

*Study Patients*

To be eligible for ACOS, subjects had to be enrolled in FACTT and EA-PAC (E1) and ACOS-specific regulatory approval had to be in place. FACTT enrolled mechanically ventilated adults who met the American-European Consensus Conference criteria for ALI (E2). In FACTT, subjects were assigned at random to a conservative or liberal fluid management strategy (E3), and either a central venous catheter or PAC (E4) in a two-by-two factorial design. Baseline characteristics, including the presence of pre-existing dementia and site of enrollment, and medical data were collected prospectively as part of FACTT. We categorized the geographic region within the continental United States into one of five categories (Northeast, South, Southwest, Midwest, and West) based on the site of enrollment, consistent with prior studies (E5). On-study data, including hemodynamic, respiratory, renal and metabolic variables, were collected and recorded daily by the ARDS Network data coordinating center, as were cumulative fluid balance, organ-failure-free day assessments, ICU length of stay, and duration of mechanical ventilation (E3).

*Cognitive and Psychiatric Function*

A validated telephone battery of standardized neuropsychological tests was administered to consenting, English-speaking subjects at 2 and 12 months post-hospital discharge. Subjects were not required to undergo 2 month testing to be tested at 12 months. The test administration call center was centralized at the University of Pittsburgh. The telephone battery was administered using a

detailed standardized script by two non-neuropsychologists at the University of Pittsburgh who were blinded to group randomization. These two investigators received formal training from neuropsychologists and were evaluated for competence during the pilot interview stage prior to administering tests to subjects. The details of formation and validation of the battery used in this study have been presented previously (E6-8).

The following cognitive domains were assessed: vocabulary, reasoning, memory, verbal fluency and executive function. Executive function is a set of cognitive abilities that enable individuals to engage in purposeful, goal-directed behaviors, cognitive flexibility, abstract thinking, initiate behavior and are necessary for effective daily functioning. Memory, verbal fluency, and executive function were hypothesized to be domains susceptible to impairment in ALI survivors based on previous investigations in this population (E6, E8-E10). Anxiety, depression, and post-traumatic stress disorder (PTSD) symptoms were assessed using standardized measures (E11-14). Neuropsychological tests were reviewed, scored, and standardized by neuropsychologists at the University of Pennsylvania. Instruments used to assess each neuropsychological domain are presented in Table E1 (E11-18). To minimize the effect of order presentation, the tests were administered in random sequence (E6-E8).

### *Data Analysis*

The cognitive battery yielded scaled scores for each domain which were normalized to allow for comparisons across tests and subjects (E19-20). We

report the median and interquartile range of results as percentiles. We defined impairment in a single domain as a score  $> 2$  SD below the population normative data (E9-10, 21-22), a conservative definition of cognitive impairment that represents significant deficits outside the normal range of cognitive function. Cognitive impairment at the subject level was defined as impairment in memory, verbal fluency, and/or executive function in subjects who completed tests in each of these domains. We used the most conservative criteria to define impairment in a single domain and limited our cognitive assessment *a priori* to three domains shown to be affected in ALI survivors in previous studies (E6, E8-10) to minimize the probability of a Type I error to an acceptable alpha level of  $< 0.05$  (E22).

The Beck Anxiety Inventory and the Zung Self-Rating Depression Scale are scored as none, mild, moderate and severe (E11-13). Patients with moderate or severe anxiety or depression were classified as impaired similar to previous studies (E6, E8, E21). The modified Post-traumatic Stress Syndrome 10-Questions Inventory (PTSS-10) is scored as normal or impaired (E14). Psychiatric impairment was defined as impairment in any, or multiple, of the three psychiatric measures (anxiety, depression, and PTSD) in subjects completing tests in each of these domains. We focused our study on survivors tested at approximately 12 months post-discharge to assess long-term neuropsychological function.

Based on prior studies, we *a priori* hypothesized that cognitive impairment would be associated with duration of mechanical ventilation, either conservative or liberal fluid-management strategy (E3), hypotension (E10), hypoxemia (E9),

PAC use (E4, E23), sepsis as the primary cause of lung injury (E24-25), and severity of illness (E26). PAC use was considered as a candidate risk factor given its association with arrhythmias and the potential risk of paradoxical air and/or microthrombotic embolism given the prevalence of moderate-to-large patent foramen ovale shunting in patients with ARDS (E23, E27-E28). There was no standardized delirium assessment in FACTT (E3-4) to permit adjusting for duration of delirium, which was recently shown to be associated with long-term cognitive impairment (E29-30). The pre-specified potential confounding variables included: age, gender, race, history of heavy alcohol use or cerebrovascular disease, level of education, the presence of concomitant psychiatric impairment, hospital length of stay prior to enrollment, and the time to testing (E6, E8-10, E21, E31-33).

We used baseline measures and daily measurements during the study (“on-study” data) to explore our hypotheses. On-study data from FACTT were summarized at the subject level as means to account for influential observations. We used hemodynamic values (systolic blood pressure (SBP), vasopressor use, cardiac index) and protocol assignment to shock cells from FACTT (E3-E4) to explore the potential causative role of hypotension (E10) and central venous pressure (CVP) to explore the potential role of fluid-management strategy. Respiratory values (partial pressure of arterial oxygen,  $\text{PaO}_2$ , partial pressure of arterial oxygen to fraction of inspired oxygen,  $\text{PaO}_2:\text{FiO}_2$ , oxygenation index, and oxygen saturation) were assessed to explore the potential causative role of hypoxemia (E9). We used Acute Physiologic and Chronic Health Evaluation

(APACHE) III scores and intensive care unit (ICU) length of stay for severity of illness measures.

With the exception of the shock assessment, which was measured as often as every 4 hours, and SBP and  $\text{PaO}_2:\text{FiO}_2$ , in which the worst values over the preceding 24 hours were recorded to derive the Brussels organ failure score, values were measured and recorded daily (measure closest to 8 am) during the study.

In addition, serum sodium, bicarbonate, blood urea nitrogen, creatinine, glucose (E34), organ-failure-free (cardiovascular, central nervous system, and renal) days (E35), and cumulative furosemide and corticosteroid dose given their potential anticholinergic activity (E36-37), were assessed in exploratory analyses (see Table E5).

Based on prior studies and/or plausibility, we tested the following candidate risk factors for the development of psychiatric morbidity: age (E38-E40), gender (E38-41), race/ethnicity, level of education (E39, E42), APACHE III, the trial interventions (fluid-management strategy, PAC), hypotension, hypoxemia (E38-39), any episode of hypoglycemia during the hospitalization (E43), corticosteroid administration (E43), ICU length of stay (E45-E46), and duration of mechanical ventilation (E38, E45).

Comparisons between groups were made using Student's t-test or Wilcoxon's rank-sum test for continuous variables and the chi-squared statistic or Fisher's exact test for categorical variables. In the presence of a significant association, continuous measurements were categorized based on the

distribution into quartiles to assess for dose-response effects. Quality of life was assessed at 12 months post-discharge as part of the EA-PAC study (E1). Quality of life was measured using the Health Utilities Index Mark 2 (E47).

*Statistical Analysis:*

Multivariable logistic regression was used to investigate the relationship between candidate risk factors and long-term neuropsychological impairment (cognitive impairment and psychiatric morbidity). We adjusted for each candidate risk factor and potential covariates with an alpha level of significance  $< 0.20$  in univariate analyses (E48). Age and level of education were forced into the final cognitive models to account for potential differences in pre-morbid cognitive impairment. Time to testing and race were forced into the final cognitive models to account for potential time and survival biases. To avoid over-fitting the model, adjustment for potential confounding was performed one covariate at-a-time (E49). Multivariable logistic regression was also used to investigate the relationship between sociodemographic factors and consent to participate in a study of long-term neuropsychological function. For all analyses, associations were reported as an OR with 95% confidence intervals (CI). A standard two-tailed p-value of  $\leq 0.05$  was used to signify statistical significance. Statistical analyses were performed using Stata 10.0 software (Stata Datacorp, College Station, TX).

The primary analysis was limited to 75 survivors who completed testing in all three cognitive domains of interest at 12 months: memory, verbal fluency, and



executive function. The Hayling Sentence Completion Test (HSCT) assesses executive function with an error score and response latency component to produce an overall score. The response times for the HSCT were not measured before February, 2005 due to an error in the administration of the timing of the test. This error effected 21 of 102 survivors (8 randomized to the liberal-strategy group and 13 to the conservative-strategy group) at 12 months. In secondary analyses, 90 survivors who completed assessments in memory, verbal fluency, and the error score of the HSCT at 12 months were carried out.

*Sensitivity Analyses:*

We performed multiple sensitivity analyses to determine the effects of missing data on the observed association between fluid-management strategy and long-term cognitive impairment. To assess the potential effects of morbidity and mortality post-consent, we assumed that all 31 subjects who died post-consent or were classified as incapable to have the tests administered were impaired. To assess the potential effects of loss to follow-up post-consent, we first assumed that all 50 survivors reported as lost to follow-up were impaired, then we assumed that all 50 survivors reported as lost to follow-up were not impaired, and finally we assumed that impairment in those lost to follow-up was similar to the 55% incidence observed for the full cohort. To assess the potential effects of the 25 survivors who refused testing, we performed separate analyses using these same three assumptions. Finally, to gauge the potential effects of incomplete cognitive assessments on the associations identified in the primary

analysis, we assumed that all 27 survivors without a complete cognitive assessment were impaired, and then assumed that survivors without a complete cognitive assessment were not impaired. To minimize the assumptions of the latter scenario, survivors were categorized as impaired if the subject was impaired in a tested domain.

## Results

### *Association between Risk Factors and Cognitive Domain Performance:*

Lower PaO<sub>2</sub> values correlated with worse executive function (rho=0.24, p=0.05), but not verbal fluency (rho=0.16, p=0.14) or memory (rho=0.14, p=0.20). Similarly, lower central venous pressures correlated with worse executive function (rho=0.28, p=0.02), but not verbal fluency (rho= -0.07, p=0.47) or memory (rho=0.14, p=0.20). Enrollment in the conservative fluid-strategy group correlated with worse executive function (rho= -0.39, p<0.001), but not verbal fluency (rho= -0.01, p=0.89) or memory (rho= -0.12, p=0.25).

### *Association between Risk Factors and Anxiety, Depression, and PTSD:*

Lower PaO<sub>2</sub> values were associated with anxiety (p=0.05), as were lower systolic blood pressures (p=0.04). Neither lower PaO<sub>2</sub> values, nor lower systolic blood pressures, were found to be associated with depression or PTSD. An episode of hypoglycemia was associated with anxiety at 12 months (p=0.01), but not depression (p=0.28), or PTSD (p=0.31).

*Sensitivity Analyses:*

Given the potential bias due to the effects of dropouts, we performed several sensitivity analyses. Under the assumption that all 31 subjects who consented for ACOS but died before testing (N=22) or were classified as incapable of test performance (N=9) were impaired (Figure 1), the association between conservative fluid-management strategy and long-term cognitive impairment remained significant (N=106, OR=3.48, 95% CI: 1.48, 8.16, p=0.004). The association also persisted if we assumed that the 50 survivors lost to follow-up post-consent were all impaired (N=125, OR=2.92, 95% CI: 1.28, 6.61, p=0.01), were all not impaired (N=125, OR=2.45, 95% CI: 1.14, 5.28, p=0.02), or were impaired to a similar degree (55% incidence) as the overall cohort of long-term survivors (N=125, OR=2.24, 95%CI: 1.10, 4.59, p=0.03). The association also persisted if we assumed that the 25 patients who refused after initially consenting were all impaired (N=100, OR=2.51, 95% CI: 1.05, 5.97, p=0.04), were all not impaired (N=100, OR=3.76, 95% CI: 1.62, 8.72, p=0.002), or were impaired to a similar degree (55% incidence) as the overall cohort of long-term survivors (N=100, OR=2.78, 95% CI: 1.23, 6.31, p=0.01).

Assuming that survivors with an incomplete cognitive assessment were *not* impaired, we found the association between the conservative fluid management strategy and long-term cognitive impairment remained (N=102, OR=2.76, 95% CI: 1.22, 6.21, p=0.014); as did the association between lower PaO<sub>2</sub> values and long-term cognitive impairment (N=93, OR=1.36, 95% CI: 1.03, 1.81, p=0.033). Under the assumption that survivors with an incomplete cognitive

assessment were impaired, we observed an association similar to the unadjusted association between the conservative-strategy group and long-term cognitive impairment (N=102, OR=4.09, 95% CI: 1.70, 9.83, p=0.002). The association between lower PaO<sub>2</sub> values and long-term cognitive impairment was no longer significant (N=93, OR=1.26, 95% CI: 0.95, 1.66, p=0.10).

**References**

E1) Clermont G, Kong L, Weissfeld LA, Lave JR, Rubenfeld GD, Robertss MS, Connors AF, Bernard GR, Thompson BT, Wheeler AP, Angus DC. The effect of pulmonary artery catheter use on costs and long-term outcomes of acute lung injury. PLoS ONE 2011; 6(7): e22512.

E2) Bernard GR, Artigas A, Brigham KL, Carlet J, Falke K, Hudson L, Lamy M, Legall JR, Morris A, Spragg R. The American-European consensus conference on ARDS. Definitions, mechanisms, relevant outcomes, and clinical trial coordination. Am J Respir Crit Care Med 1994; 149: 818–824

E3) The National Heart, Lung, and Blood Institute Acute Respiratory Distress Syndrome (ARDS) Clinical Trials Network. Comparison of two fluid management strategies in acute lung injury. N Engl J Med 2006; 354(24): 2564-75

E4) The National Heart, Lung, and Blood Institute Acute Respiratory Distress Syndrome (ARDS) Clinical Trials Network. Pulmonary-artery versus central venous catheter to guide treatment of acute lung injury. N Engl J Med 2006; 354: 2213-24

E5) Chan PS, Nichol G, Krumholz HM, Spertus JA, Jones PG, Peterson ED, Rathore SS, Nallamothu BK, for the American Heart Association National Registry of Cardiopulmonary Resuscitation (NRCPR) Investigators. Racial differences in survivors after in-hospital cardiac arrest. JAMA 2009; 302(11): 1195-1201

E6) Christie JD, Biester R, Taichman DB, Shull WH, Hansen-Flaschen J, Shea JA, Hopkins RO. Formation and validation of a telephone battery to assess

cognitive function in acute respiratory distress syndrome survivors. *J Crit Care* 2006; 21:125-132

E7) Taichman DB, Christie J, Biester R, Mortensen J, White J, Kaplan S, Hansen-Flaschen J, Palevsky HI, Elliott CG, Hopkins RO. Validation of a brief telephone battery for cognitive assessment of patients with pulmonary arterial hypertension. *Respir Res* 2005; 6: 39

E8) Mikkelsen ME, Shull WH, Biester RC, Taichman DB, Lynch S, Demissie E, Hansen-Flaschen J, Christie JD. Cognitive, mood and quality of life impairments in a select population of ARDS survivors. *Respirology* 2009; 14: 76-82

E9) Hopkins R, Weaver L, Pope D, Orme J, Bigler E, Larson-Lohr V. Neuropsychological sequelae and impaired health status in survivors of severe acute respiratory distress syndrome. *Am J Respir Crit Care Med* 1999; 160:50-6

E10) Hopkins RO, Weaver LK, Collingridge D, Parkinson RB, Chan KJ, Orme JF. Two-year cognitive, emotional, and quality-of-life outcomes in acute respiratory distress syndrome. *Am J Respir Crit Care Med* 2005; 171:340-347

E11) Zung WK. A self-rating depression scale. *Arch Gen Psych* 1965; 12:63-70

E12) Biggs JT, Wylie LT, Ziegler VE. Validity of the Zung self-rating depression scale. *British J Psych* 1978; 132: 381-385

E13) Beck AT, Epstein N, Brown G, Steer RA. An inventory for measuring clinical anxiety: psychometric properties. *J Cons Clin Psychol* 1998; 56:893-7

E14) Weisaeth L. Torture of a Norwegian ship's crew: the torture, stress reactions and psychiatric aftereffects. *Acta Psychiatr Scand Suppl* 1989; 355: 63-

- E15) Wechsler D, ed. Wechsler Adult Intelligence Scale, Third edition. San Antonio: The Psychological Corporation; 1997
- E16) Wechsler D. Wechsler Memory Scale. San Antonio: The Psychology Corporation, 1997
- E17) Lezak MD. Neuropsychological Assessment. New York: Oxford University Press, 1995
- E18) Burgess PW, Shallice T. The Hayling and Brixton Tests. London, England: Thames Valley Test Company Limited, 2007
- E19) Heaton RK, Grant I, Matthews CG. *Comprehensive norms for an expanded Halstead-Reitan Battery: demographic corrections, research findings and clinical applications*. Psychological Assessment Resources, Inc., Odessa, 1991
- E20) Heaton RK. *Comprehensive norms for an expanded Halstead-Reitan Battery: A supplement for the WAIS-R*. Psychological Assessment Resources, Inc., Odessa, 1994
- E21) Hopkins RO, Weaver LK, Chan KJ, Orme JF. Quality of life, emotional, and cognitive function following acute respiratory distress syndrome. *J Int Neuropsychol Soc* 2004; 10:1005-1017
- E22) Ingraham LJ, Aiken CB. An empirical approach to determining criteria for abnormality in test batteries with multiple measures. *Neuropsychology* 1996; 10:120-124

E23) Boyd KD, Thomas SJ, Boyd AD. A prospective study of complications of pulmonary artery catheterizations in 500 consecutive patients. *Chest* 1983; 84: 245-249

E24) Reichenberg A, Yirmiya R, Schuld A, Kraus T, Haack M, Morag A, Pollmächer T. Cytokine-associated emotional and cognitive disturbances in humans. *Arch Gen Psychiatry* 2001; 58: 445-452

E25) Patarca-Montero R, Antoni M, Fletcher MA, Klimas NG. Cytokine and other immunologic markers in chronic fatigue syndrome and their relation to neuropsychological factors. *Appl Neuropsychol* 2001; 8: 51-64

E26) Jones C, Griffiths RD, Slater T, Benjamin KS, Wilson S. Significant cognitive dysfunction in non-delirious patients identified during and persisting following critical illness. *Intensive Care Med* 2006; 32: 923-926

E27) Doblár DD, Hinckle JC, Fay ML, Condon BF. Air embolism associated with pulmonary artery catheter introducer kit. *Anesthesiology* 1982; 56: 307-309

E28) Mekontso Dessap A, Boissier F, Leon R, Carreira S, Campo FR, Lemaire F, Brochard L. Prevalence and prognosis of shunting across patient foramen ovale during acute respiratory distress syndrome. *Crit Care Med* 2010; 38(9): 1786-92

E29) Girard TD, Jackson JC, Pandharipande PP, Pun BT, Thompson JL, Shintani AK, Gordon SM, Canonico AE, Dittus RS, Bernard GR, Ely EW. Delirium as a predictor of long-term cognitive impairment in survivors of critical illness. *Crit Care Med* 2010; 38(7): 1513-20



E30) Van den Boogard M, Schoonhoven L, Evers AW, van der Hoeven JG, van Achterberg TV, Pickkers P. Delirium in critically ill patients: impact on long-term health-related quality of life and cognitive functioning. *Crit Care Med* 2012; 40(1): 112-118

E31) Ngandu T, von Strauss E, Helkala EL, Winblad B, Nissinen A, Tuomilehto J, Soininen H, Kivipelto M. Education and dementia: what lies behind the association ? *Neurology* 2007; 69: 1442-1450

E32) Richards PM, Ruff RM. Motivational effects on neuropsychological functioning: comparison of depressed versus nondepressed individuals. *J Consult Clin Psychol* 1989; 57: 396-402

E33) Buckelew SP, Hannay HJ. Relationships among anxiety, defensiveness, sex, task difficulty and performance on various neuropsychological tasks. *Percept Mot Skills* 1986; 63: 711-718

E34) Hopkins RO, Suchyta MR, Snow GL, Jephson A, Weaver LK, Orme JF. Blood glucose dysregulation and cognitive outcomes in ARDS survivors. *Brain Inj* 2010; 24(12): 1478-84

E35) Schoenfeld DA, Bernard GR. Statistical evaluation of ventilator-free days as an efficacy measure in clinical trials of treatments for acute respiratory distress syndrome. *Crit Care Med* 2002; 30: 1772-1777

E36) Milbrandt EB, Angus DC. Bench-to-bedside review: Critical-illness associated cognitive dysfunction – mechanisms, markers, and emerging therapeutics. *Critical Care* 2006; 10: 238

E37) Mulsant BH, Pollock BG, Kirshner M, Shen C, Dodge H, Ganguli M. Serum anticholinergic activity in a community-based sample of older adults: relationship with cognitive performance. *Arch Gen Psychiatry* 2003; 60: 198 – 203

E38) Hopkins RO, Key CW, Suchyta DO, Weaver LK, Orme JF. Risk factors for depression and anxiety in survivors of acute respiratory distress syndrome. *Gen Hosp Psych* 2010; 32: 147-155

E39) Desai S, Lawa TJ, Needham DM. Long-term complications of critical care. *Crit Care Med* 2011; 39(2): 371-379

E40) Davydow DS, Gifford JM, Desai SV, Needham DM, Bienvenu OJ. Posttraumatic stress disorder in general intensive care unit survivors: a systematic review. *Gen Hosp Psych* 2008; 30: 421-434

E41) Davydow DS, Gifford JM, Desai SV, Bienvenu OJ, Needham DM. Depression in general intensive care unit survivors: a systematic review. *Int Care Med* 2009; 35: 796-809

E42) Dowdy DW, Bienvenu OJ, Dinglas V, Mendez-Tellez PA, Sevransky J, Shanholtz C, Needham DM. Are intensive care factors associated with depressive symptoms six months after acute lung injury? *Crit Care Med* 2009; 37: 1702-1707

E43) Dowdy DW, Dinglas V, Mendez-Tellez PA, Bienvenu OJ, Sevransky J, Dennison CR, Shanholtz C, Needham DM. Intensive care unit hypoglycemia predicts depression during early recovery from acute lung injury. *Crit Care Med* 2008; 36: 2726-2733

E44) Schelling G, Stoll C, Kapfhammer HP, Rothenhausler HB, Krauseneck T, Durst K, Haller M, Briegel J. The effect of stress doses of hydrocortisone during septic shock on posttraumatic stress disorder and health-related quality of life in survivors. *Crit Care Med* 1999; 27: 2678-2683

E45) Nelson BJ, Weinert CR, Burly CL, Marinelli WA, Gross CR. Intensive care unit drug use and subsequent quality of life in acute lung injury patients. *Crit Care Med* 2000; 28(11): 3626-30

E46) Kapfhammer HP, Rothenhausler HB, Krauseneck T, Stoll C, Schelling G. Posttraumatic stress disorder and health-related quality of life in long-term survivors of acute respiratory distress syndrome. *Am J Psych* 2004; 161(1): 45-52

E47) Torrance GW, Feeny DH, Furlong WJ, Barr RD, Zhang Y, Wang Q. Multi-attribute preference functions for a comprehensive health status classification system: Health utilities index Mark 2. *Medical Care* 1996; 34(7): 702-722

E48) Maldonado G, Greenland S. Simulation study of confounder-selection strategies. *Amer J of Epid* 1993; 138:923-936

E49) Peduzzi P, Concato J, Kemper E, Holford TR, Feinstein AR. A simulation study of the number of events per variable in logistic regression analysis. *J Clin Epidemiol* 1996; 49: 1373-1379

Figure E1. Enrollment and outcomes by fluid-management strategy.

Abbreviations: ACOS=ARDS Cognitive Outcomes Study

Table E1. Outcomes measured in the neuropsychological test battery and cognitive domain performance at 12 months. Cognitive domains are listed by increasing prevalence of impairment in the 102 long-term ALI survivors.

| <u>Cognitive Domain</u>        | <u>Instrument</u>                                                    | <u>No.</u> | <u>Percentile</u> |
|--------------------------------|----------------------------------------------------------------------|------------|-------------------|
| Vocabulary *                   | WAIS-III: Vocabulary <sup>E14</sup>                                  | 98         | 25 (9 – 50)       |
| Reasoning *                    | WAIS – III: Similarities <sup>E14</sup>                              | 98         | 37 (16 – 63)      |
| Memory †                       | WMS – III: Logical Memory I <sup>E15</sup>                           | 92         | 37 (5 – 63)       |
| Verbal Fluency †               | Controlled Oral Word Association Test <sup>E16</sup>                 | 96         | 19 (4 – 34)       |
| Executive Functioning †        | Hayling Sentence Completion Test (HSCT) <sup>E17</sup>               | 76         | 5 (<1 – 25)       |
| <u>Psychiatric Domain</u>      | <u>Instrument</u>                                                    |            |                   |
| Anxiety                        | Beck Anxiety Inventory <sup>E12</sup>                                | 102        |                   |
| Depression                     | Zung Self-Rating Depression Scale <sup>E10-E11</sup>                 | 102        |                   |
| Post-traumatic stress disorder | Post-traumatic Stress Syndrome 10-Questions Inventory <sup>E13</sup> | 102        |                   |

*Definition of abbreviation:* HSCT=Hayling Sentence Completion Test; WAIS-III=Wechsler Adult Intelligence Scale-III; WMS-III: Wechsler Memory Scale-III.

\* Domain a priori hypothesized to be resilient to effects of acute lung injury.

† Domain a priori hypothesized to be susceptible to effects of acute lung injury.

‡ The error score of the HSCT was completed in 100 long-term survivors.

Individual cognitive domain performance expressed as percentiles based on normative data.

Table E2. Patient characteristics and consent to participate in a study to assess long-term neuropsychological outcomes.

| <u>Variable*</u>                    | <u>Consent Rate</u> <sup>†</sup> | <u>p-value</u> | <u>Adjusted Odds Ratio</u><br><u>(95% CI)</u> <sup>‡</sup> | <u>p-value</u> |
|-------------------------------------|----------------------------------|----------------|------------------------------------------------------------|----------------|
| Age, years (%)                      |                                  |                |                                                            |                |
| Age < 39                            | 47/156 (30)                      | 0.02           | Reference                                                  | Reference      |
| Age 40 – 48                         | 65/162 (40)                      |                | 1.59 (0.93 – 2.69)                                         | 0.09           |
| Age 49 – 59                         | 58/166 (35)                      |                | 1.28 (0.75 – 2.18)                                         | 0.37           |
| Age ≥ 60                            | 43/171 (25)                      |                | 1.23 (0.70 – 2.19)                                         | 0.47           |
| Gender (%)                          |                                  |                |                                                            |                |
| Female sex                          | 114/308 (37)                     | 0.02           | Reference                                                  | Reference      |
| Male sex                            | 99/347 (28)                      |                | 0.75 (0.52 – 1.11)                                         | 0.15           |
| Race or ethnic group (%)            |                                  |                |                                                            |                |
| White non-Hispanic                  | 166/446 (37)                     | 0.001          | Reference                                                  | Reference      |
| Black non-Hispanic                  | 34/136 (25)                      |                | 0.73 (0.44 – 1.22)                                         | 0.23           |
| Hispanic <sup>§</sup>               | 12/60 (20)                       |                | 0.55 (0.26 – 1.13)                                         | 0.10           |
| Other <sup>§</sup>                  | 1/13 (8)                         |                |                                                            |                |
| United States geographic region (%) |                                  |                |                                                            |                |
| Northeast                           | 49/128 (38)                      | 0.001          | Reference                                                  | Reference      |
| Southeast                           | 70/192 (36)                      |                | 1.78 (0.90 – 3.55)                                         | 0.10           |
| Southwest                           | 22/124 (18)                      |                | 0.64 (0.32 – 1.25)                                         | 0.19           |
| Midwest                             | 32/83 (38)                       |                | 1.28 (0.74 – 2.21)                                         | 0.37           |
| West                                | 40/128 (31)                      |                | 1.62 (0.90 – 2.93)                                         | 0.11           |

\* Sociodemographic and hospital-level information in those 655 subjects who consented to long-term follow-up as part of EA-PAC (E1). Age was categorized into quartiles based on the observed distribution.

<sup>†</sup> Of 442 subjects who consented to EA-PAC, but not ACOS, 194 died between EA-PAC consent and completion of long-term follow-up, 55 were ineligible as the time window to be tested had elapsed due to the regulatory halt, 48 declined, and the remaining 145 were categorized as “not consented.”

<sup>‡</sup> Adjusted for each variable and whether patient died during long-term follow-up after excluding the 55 ineligible subjects.

<sup>§</sup> Hispanic and other race/ethnicity were collapsed into one group in the multivariable logistic regression model.

Table E3. Characteristics of long-term survivors with complete cognitive testing, by fluid-management strategy.

|                                                  | <u>Liberal</u><br>(N=37) | <u>Conservative</u><br>(N=38) | <u>p-value</u> |
|--------------------------------------------------|--------------------------|-------------------------------|----------------|
| Age, years                                       | 53 (43 – 60)             | 50 (47 – 56)                  | 0.75           |
| Male sex (%)                                     | 43                       | 42                            | 0.92           |
| Race or ethnic group (%)                         |                          |                               |                |
| White non-Hispanic                               | 92                       | 89                            | 1.00           |
| Black non-Hispanic                               | 8                        | 8                             |                |
| Hispanic                                         | 0                        | 3                             |                |
| Level of education, years                        | 12 (12 – 16)             | 12 (12 – 16)                  | 0.43           |
| Time from enrollment to testing, months          | 13 (12 – 13)             | 12 (12 – 14)                  | 0.64           |
| Time from discharge to testing, months           | 12 (11 – 13)             | 12 (11 – 13)                  | 0.97           |
| Previously Tested                                | 24                       | 37                            | 0.24           |
| Primary lung injury (%)                          |                          |                               |                |
| Pneumonia                                        | 30                       | 42                            | 0.20           |
| Sepsis                                           | 30                       | 18                            |                |
| Aspiration                                       | 11                       | 16                            |                |
| Trauma                                           | 5                        | 16                            |                |
| Multiple transfusions                            | 5                        | 3                             |                |
| Other                                            | 19                       | 5                             |                |
| Coexisting conditions (%) <sup>†</sup>           |                          |                               |                |
| Diabetes                                         | 16                       | 19                            | 0.76           |
| HIV infection or AIDS                            | 0                        | 0                             | –              |
| Cirrhosis                                        | 5                        | 3                             | 1.00           |
| Solid tumors                                     | 0                        | 3                             | 1.00           |
| Leukemia                                         | 0                        | 3                             | 1.00           |
| Lymphoma                                         | 5                        | 0                             | 0.49           |
| Immunosuppression                                | 8                        | 11                            | 1.00           |
| Medical ICU (%)                                  | 59                       | 53                            | 0.87           |
| APACHE III <sup>†</sup>                          | 90 (64 – 107)            | 65 (58 – 89)                  | 0.04           |
| Glasgow Coma Scale                               | 7 (3 – 11)               | 8 (7 – 11)                    | 0.44           |
| Mean arterial pressure, mm Hg                    | 74 (66 – 84)             | 77 (65 – 86)                  | 0.68           |
| Met shock criteria at baseline (%)               | 46                       | 39                            | 0.57           |
| Vasopressor use at baseline (%)                  | 43                       | 32                            | 0.30           |
| Pre-randomization fluid balance, mL <sup>†</sup> | 1869<br>(522 – 5564)     | 1261<br>(450 – 3744)          | 0.29           |
| PaO <sub>2</sub> :FiO <sub>2</sub> <sup>‡</sup>  | 120 (87 – 162)           | 124 (80 – 180)                | 0.61           |



|                               |               |              |      |
|-------------------------------|---------------|--------------|------|
| PaO <sub>2</sub> <sup>¶</sup> | 80 (67 – 105) | 82 (67 – 97) | 0.81 |
| Pulmonary artery catheter (%) | 62            | 53           | 0.40 |

*Definition of abbreviation:* HIV=human immunodeficiency virus; AIDS=acquired immunodeficiency syndrome; ICU=intensive care unit; APACHE III= Acute Physiologic and Chronic Health Evaluation III scores; PaO<sub>2</sub>:FiO<sub>2</sub>=ratio of partial pressure of arterial oxygen to fraction of inspired oxygen.

Values expressed as a percentage or median (interquartile range).

\* Measured in 74 survivors; † measured in 73 survivors; ‡ measured in 71 survivors; ¶ measured in 72 survivors. Shock at baseline present if mean arterial pressure < 60 at baseline or vasoactive agent administered.

Table E4. On-study physiologic variables and outcomes of long-term survivors with complete cognitive testing, by fluid-management strategy.

|                                              | Fluid-Management Strategy |                         |         |
|----------------------------------------------|---------------------------|-------------------------|---------|
|                                              | Liberal<br>(N=37)         | Conservative<br>(N=38)  | p-value |
| Hemodynamic variables                        |                           |                         |         |
| Systolic Blood Pressure (mm Hg) *            | 108 (102 – 114)           | 102 (96 – 112)          | 0.11    |
| Cardiac index (liters/min/m <sup>2</sup> ) † | 4.8 (4.2 – 5.5)           | 4.2 (3.3 – 4.7)         | 0.06    |
| CVP (mm Hg)                                  | 12.0 (10.4 – 13.8)        | 9.4 (6.6 – 11)          | <0.001  |
| CVP < 8 mm Hg (1 <sup>st</sup> quartile) (%) | 16                        | 37                      |         |
| CVP 8 – 12 mm Hg                             | 43                        | 50                      | 0.015   |
| CVP > 12 mm Hg (4 <sup>th</sup> quartile)    | 40                        | 13                      |         |
| Shock ‡ (%)                                  | 27                        | 34                      | 0.50    |
| Vasopressor use (%)                          | 19                        | 32                      | 0.21    |
| Ineffective circulation (%)                  | 16                        | 8                       | 0.31    |
| Fluid balance (cumulative over 7 days, mL)   | 1659<br>(-4236 – 6244)    | -2706<br>(-7970 – -336) | 0.02    |
| Respiratory variables                        |                           |                         |         |
| PaO <sub>2</sub> :FiO <sub>2</sub>           | 158 (128 – 191)           | 156 (133 – 191)         | 0.60    |
| Oxygenation index                            | 7.50 (5.11 – 10.3)        | 7.30 (5.16 – 10.05)     | 0.94    |
| PaO <sub>2</sub>                             | 79 (70 – 97)              | 72 (68 – 84)            | 0.14    |
| PaCO <sub>2</sub>                            | 43 (35 – 46)              | 42 (36 – 48)            | 0.59    |
| PEEP                                         | 7 (6.2 – 8.4)             | 6.9 (5 – 8)             | 0.39    |
| Oxygen saturation (%)                        | 95 (92.8 – 96.6)          | 94.5 (92.7 – 96)        | 0.54    |
| pH                                           | 7.41 (7.37 – 7.44)        | 7.44 (7.40 – 7.45)      | 0.01    |
| ICU length of stay (days)                    | 12 (9 – 18)               | 9 (7 – 13)              | 0.07    |
| Duration of mechanical ventilation (days)    | 8.5 (4.5 – 12)            | 6 (4 – 9)               | 0.04    |
| Glasgow coma scale †                         | 11 (11 – 12)              | 12 (10 – 14)            | 0.59    |
| Renal and metabolic variables                |                           |                         |         |
| Sodium                                       | 140 (139 – 143)           | 142 (139 – 144)         | 0.32    |
| Blood urea nitrogen (mg/dL)                  | 17.8 (15.7 – 31.6)        | 22.4 (17.0 – 32.8)      | 0.32    |
| Creatinine (mg/dl)                           | 0.98 (0.77 – 1.16)        | 0.92 (0.68 – 1.24)      | 0.63    |
| Bicarbonate (mmol/L)                         | 25.8 (24.0 – 28.9)        | 27.4 (23.0 – 32.2)      | 0.15    |
| Glucose (mg/dL)                              | 118 (110 – 144)           | 121 (108 – 134)         | 0.44    |

|                                                               |                |                 |        |
|---------------------------------------------------------------|----------------|-----------------|--------|
| Dialysis to day 60 (%)                                        | 0              | 5               | 0.49   |
| Therapy (cumulative dose)                                     |                |                 |        |
| Furosemide (mg)                                               | 120 (60 – 260) | 340 (160 – 620) | <0.001 |
| Corticosteroids (mg of Methylprednisolone)                    | 0 (0 – 96)     | 0 (0 – 144)     | 0.38   |
| Organ-Failure-Free Days                                       |                |                 |        |
| Days 1 to 7                                                   |                |                 |        |
| Cardiovascular failure                                        | 6 (5 – 7)      | 6 (4 – 7)       | 0.24   |
| CNS failure                                                   | 7 (0 – 7)      | 7 (0 – 7)       | 0.30   |
| Renal failure                                                 | 7 (7 – 7)      | 7 (7 – 7)       | 0.81   |
| Days 1 to 28                                                  |                |                 |        |
| Cardiovascular failure                                        | 27 (25 – 28)   | 26 (24 – 27)    | 0.17   |
| CNS failure                                                   | 28 (21 – 28)   | 28 (21 – 28)    | 0.29   |
| Renal failure                                                 | 28 (28 – 28)   | 28 (28 – 28)    | 0.71   |
| Psychiatric impairment, 12 months post-hospital discharge (%) | 65             | 76              | 0.28   |

*Definition of abbreviation:* CVP=central venous pressure; ICU=intensive care unit; PaO<sub>2</sub>:FiO<sub>2</sub>=ratio of partial pressure of arterial oxygen to fraction of inspired oxygen; PaO<sub>2</sub>=partial pressure of arterial oxygen; PaCO<sub>2</sub>=partial pressure of arterial carbon dioxide; PEEP=positive end-expiratory pressure; ICU=intensive care unit; CNS=central nervous system.

Values expressed as a frequency (percent) or median (interquartile range).

On-study variables were summarized at the subject level as means to account for influential observations. With the exception of systolic blood pressure measurements, values were measured and recorded daily (measure closest to 8 am) during the study.

\* Lowest systolic blood pressure was recorded daily to determine the cardiovascular component of the Brussels organ failure score.

† Cardiac index was measured in 39 survivors (20 in the liberal-strategy group and 19 in the conservative-strategy group).

‡ Shock defined as mean arterial pressure < 60 or vasoactive agent use (assignment to FACTT protocol cells 1 or 2) at any time during FACTT (E3). Ineffective circulation was defined as a cardiac index of less than 2.5 liters per minute per square meter in the PAC group and as cold, mottled skin with a capillary re-filling time of greater than 2 seconds in the non-PAC group (E3).

Table E5. Associations with long-term cognitive impairment in ALI survivors. Cognitive impairment at the subject level was defined as impairment in memory, verbal fluency, and/or executive function in the 75 subjects who completed tests in each of these domains.

|                                                   | <u>Cognitive Impairment</u>   |                           | <u>p-value</u> |
|---------------------------------------------------|-------------------------------|---------------------------|----------------|
|                                                   | <u>Not Impaired</u><br>(n=34) | <u>Impaired</u><br>(n=41) |                |
| Baseline characteristics                          |                               |                           |                |
| Age, years                                        | 50 (43 – 58)                  | 51 (45 – 60)              | 0.51           |
| Male sex (%)                                      | 32                            | 51                        | 0.10           |
| Race or ethnic group (%)                          |                               |                           |                |
| White                                             | 91                            | 90                        | 0.53           |
| Black                                             | 6                             | 10                        |                |
| Hispanic                                          | 3                             | 0                         |                |
| Level of education, years                         | 13 (12 – 16)                  | 12 (12 – 15)              | 0.36           |
| Hospital length of stay prior to enrollment, days | 2 (1 – 3)                     | 3 (1 – 4)                 | 0.22           |
| ARDS at enrollment                                | 88                            | 90                        | 1.00           |
| Primary lung injury (%)                           |                               |                           |                |
| Pneumonia                                         | 24                            | 46                        | 0.10           |
| Sepsis                                            | 29                            | 20                        |                |
| Aspiration                                        | 9                             | 17                        |                |
| Trauma                                            | 12                            | 10                        |                |
| Multiple transfusions                             | 6                             | 2                         |                |
| Other                                             | 21                            | 5                         |                |
| Coexisting conditions (%)                         |                               |                           |                |
| Diabetes                                          | 18                            | 17                        | 1.00           |
| HIV infection or AIDS                             | 0                             | 0                         | –              |
| Cirrhosis                                         | 0                             | 7                         | 0.25           |
| Solid tumors                                      | 0                             | 2                         | 1.00           |
| Leukemia                                          | 3                             | 0                         | 0.45           |
| Lymphoma                                          | 6                             | 0                         | 0.20           |
| Immunosuppression                                 | 9                             | 10                        | 1.00           |
| Heavy alcohol use                                 | 3                             | 13                        | 0.21           |
| Cerebrovascular disease                           | 0                             | 2                         | 1.00           |
| Medical ICU (%)                                   | 59                            | 54                        | 0.56           |
| APACHE III                                        | 87 (60 – 106)                 | 72 (60 – 94)              | 0.42           |
| Glasgow Coma Scale                                | 8 (6 – 9)                     | 8 (6 – 11)                | 0.39           |
| Mean arterial pressure, mm Hg                     | 80 (72 – 87)                  | 72 (62 – 84)              | 0.12           |
| Met shock criteria * (%)                          | 44                            | 41                        | 0.82           |
| Vasopressor use (%)                               | 44                            | 32                        | 0.27           |
| Pre-randomization fluid balance, mL               | 2109<br>(450 – 5189)          | 1437<br>(679 – 3744)      | 0.44           |

|                                                      |                         |                        |       |
|------------------------------------------------------|-------------------------|------------------------|-------|
| PaO <sub>2</sub> :FiO <sub>2</sub>                   | 122 (76 – 170)          | 126 (87 – 166)         | 0.75  |
| PaO <sub>2</sub>                                     | 81 (66 – 104)           | 81 (67 – 99)           | 0.97  |
| Conservative strategy (%)                            | 32                      | 66                     | 0.004 |
| Pulmonary artery catheter (%)                        | 53                      | 61                     | 0.48  |
| On-study variables                                   |                         |                        |       |
| Hemodynamic variables                                |                         |                        |       |
| Systolic Blood Pressure (mm Hg) †                    | 108 (102 – 113)         | 104 (96 – 112)         | 0.32  |
| Cardiac index (liters/min/m <sup>2</sup> ) ‡         | 4.5 (3.8 – 5.3)         | 4.5 (3.7 – 5.0)        | 0.49  |
| CVP (mm Hg)                                          | 11.0 (8.7 – 12.7)       | 9.7 (6.6 – 12.0)       | 0.038 |
| CVP < 8 mm Hg (1 <sup>st</sup> quartile) (%)         | 12                      | 39                     |       |
| CVP 8 – 12 mm Hg                                     | 53                      | 41.5                   | 0.02  |
| CVP > 12 mm Hg (4 <sup>th</sup> quartile)            | 35                      | 19.5                   |       |
| Shock * (%)                                          | 32                      | 29                     | 0.77  |
| Vasopressor use                                      | 26                      | 24                     | 0.84  |
| Ineffective circulation *                            | 9                       | 15                     | 0.50  |
| Fluid balance (cumulative over 7 days, mL)           | -2352<br>(-5236 – 3598) | -503<br>(-4236 – 5698) | 0.24  |
| Respiratory variables                                |                         |                        |       |
| PaO <sub>2</sub> :FiO <sub>2</sub> §                 | 152 (132 – 192)         | 157 (133 – 190)        | 0.63  |
| Oxygenation index                                    | 7.38 (4.55 – 10.42)     | 7.67 (5.97 – 10.02)    | 0.57  |
| PaO <sub>2</sub>                                     | 86 (70 – 98)            | 71 (67 – 80)           | 0.02  |
| PaO <sub>2</sub> < 68 (1 <sup>st</sup> quartile) (%) | 13                      | 27                     |       |
| PaO <sub>2</sub> 68 – 93                             | 50                      | 65                     | 0.014 |
| PaO <sub>2</sub> > 93 (4 <sup>th</sup> quartile)     | 37                      | 8                      |       |
| PaCO <sub>2</sub>                                    | 43 (36 – 47)            | 42 (35 – 48)           | 0.96  |
| PEEP                                                 | 7 (5 – 9)               | 7 (6 – 7.8)            | 0.84  |
| Oxygen saturation (%)                                | 95.1 (93.3 – 96.8)      | 94.2 (92.6 – 95.8)     | 0.10  |
| pH                                                   | 7.42 (7.38 – 7.44)      | 7.43 (7.40 – 7.45)     | 0.27  |
| ICU length of stay (days)                            | 11 (8 – 18)             | 10 (7 – 16)            | 0.65  |
| Duration of mechanical ventilation (days)            | 8 (4 – 11)              | 6 (4 – 9)              | 0.43  |
| Glasgow coma scale                                   | 11 (11 – 13)            | 12 (11 – 14)           | 0.66  |
| Renal and metabolic variables                        |                         |                        |       |
| Sodium                                               | 141 (139 – 144)         | 142 (139 – 144)        | 0.49  |
| Blood urea nitrogen (mg/dL)                          | 20.6 (15.7 – 32.8)      | 19.8 (15.7 – 31.6)     | 0.94  |
| Creatinine (mg/dl)                                   | 0.98 (0.69 – 1.24)      | 0.86 (0.70 – 1.14)     | 0.36  |
| Bicarbonate (mmol/L)                                 | 26.6 (24.1 – 29.6)      | 25.9 (23.0 – 30.4)     | 0.95  |
| Glucose (mg/dL)                                      | 124 (110 – 138)         | 118 (108 – 135)        | 0.74  |
| Hypoglycemia, < 60 mg/dL (%)                         | 6                       | 12                     | 0.45  |
| Hyperglycemia, > 180 mg/dL (%)                       | 26                      | 37                     | 0.35  |

|                                            |                 |                |      |
|--------------------------------------------|-----------------|----------------|------|
| Dialysis to day 60 (%)                     | 0               | 5              | 0.50 |
| Therapy (cumulative dose)                  |                 |                |      |
| Furosemide (mg)                            | 200 (120 – 420) | 200 (80 – 440) | 0.62 |
| Corticosteroids (mg of Methylprednisolone) | 0 (0 – 144)     | 0 (0 – 136)    | 0.80 |
| Organ-Failure-Free Days                    |                 |                |      |
| Days 1 to 7                                |                 |                |      |
| Cardiovascular failure                     | 6 (5 – 7)       | 6 (4 – 7)      | 0.98 |
| CNS failure                                | 7 (0 – 7)       | 7 (0 – 7)      | 0.82 |
| Renal failure                              | 7 (7 – 7)       | 7 (7 – 7)      | 0.25 |
| Days 1 to 28                               |                 |                |      |
| Cardiovascular failure                     | 26 (24 – 28)    | 27 (24 – 27)   | 0.97 |
| CNS failure                                | 28 (21 – 28)    | 28 (21 – 28)   | 0.59 |
| Renal failure                              | 28 (28 – 28)    | 28 (28 – 28)   | 0.79 |
| Time from enrollment to testing, months    | 13 (12 – 13)    | 12 (12 – 14)   | 0.53 |
| Time from discharge to testing, months     | 12 (11 – 13)    | 12 (11 – 13)   | 0.51 |
| Previously Tested (%)                      | 38              | 24             | 0.20 |
| Neuropsychiatric impairment, 1 year (%)    | 59              | 80             | 0.04 |

*Definition of abbreviation:* HIV=human immunodeficiency virus; AIDS=acquired immunodeficiency syndrome; ARDS=acute respiratory distress syndrome ( $\text{PaO}_2:\text{FiO}_2 \leq 200$ ); ICU=intensive care unit; APACHE III= Acute Physiologic and Chronic Health Evaluation III scores;  $\text{PaO}_2:\text{FiO}_2$ =ratio of partial pressure of arterial oxygen to fraction of inspired oxygen; CVP=central venous pressure; ICU=intensive care unit;  $\text{PaO}_2$ =partial pressure of arterial oxygen;  $\text{PaCO}_2$ =partial pressure of arterial carbon dioxide; PEEP=positive end-expiratory pressure; ICU=intensive care unit; CNS=central nervous system.

Values expressed as a frequency (percent) or median (interquartile range).

On-study variables were summarized at the subject level as means to account for influential observations. With the exception of systolic blood pressure measurements, values were measured and recorded daily (measure closest to 8 am) during the study. Hypo- and hyperglycemia were defined as any episode of serum glucose  $< 60$  mg/dL or  $> 180$  mg/dL, respectively, during the hospitalization.

\* Shock defined as mean arterial pressure  $< 60$  or vasoactive agent use (assignment to FACTT protocol cells 1 or 2) at any time during FACTT (E3). Ineffective circulation was defined as a cardiac index of less than 2.5 liters per minute per square meter in the PAC group and as cold, mottled skin with a capillary re-filling time of greater than 2 seconds in the non-PAC group (E4).

† Lowest systolic blood pressure was recorded daily to determine the cardiovascular component of the Brussels organ failure score.

‡ Cardiac index was measured in 39 survivors (20 in the liberal-strategy group and 19 in the conservative-strategy group).

§ Using mean  $\text{PaO}_2:\text{FiO}_2$  on-study to categorize subjects as ALI or ARDS, 77% met criteria for ARDS ( $\text{PaO}_2:\text{FiO}_2 \leq 200$ ), 23% met criteria for ALI, and there was no association with cognitive impairment ( $p=0.82$ ).

Table E6. Association between identified candidate risk factors and long-term cognitive impairment, adjusted for each potential covariate, one covariate at-a-time.\* Cognitive impairment at the subject level was defined as impairment in memory, verbal fluency, and/or executive function in the 75 subjects who completed tests in each of these domains.

| <u>Hypoxemia</u><br><u>Logistic Regression Model</u>        | <u>Total N</u><br><u>in Model</u> | <u>Odds Ratio (95% CI)</u> | <u>p-value</u> |
|-------------------------------------------------------------|-----------------------------------|----------------------------|----------------|
| PaO <sub>2</sub> (base model) <sup>†‡§</sup>                | 67                                | 1.56 (1.09 – 2.24)         | 0.015          |
| Adjusted for:                                               |                                   |                            |                |
| Age                                                         | 67                                | 1.57 (1.08 – 2.28)         | 0.017          |
| Gender                                                      | 67                                | 1.53 (1.07 – 2.20)         | 0.021          |
| Race                                                        | 67                                | 1.52 (1.05 – 2.19)         | 0.026          |
| Level of education                                          | 67                                | 1.57 (1.09 – 2.25)         | 0.015          |
| Time to testing                                             | 67                                | 1.56 (1.09 – 2.24)         | 0.015          |
| Psychiatric impairment                                      | 67                                | 1.49 (1.03 – 2.16)         | 0.033          |
| Mean arterial pressure (baseline)                           | 66                                | 1.51 (1.05 – 2.18)         | 0.028          |
| Vasopressor use (baseline)                                  | 67                                | 1.57 (1.06 – 2.32)         | 0.023          |
| Vasopressor use <sup>‡</sup>                                | 67                                | 1.68 (1.14 – 2.49)         | 0.009          |
| Central venous pressure <sup>‡</sup>                        | 67                                | 1.60 (1.11 – 2.32)         | 0.012          |
| Primary lung injury                                         | 67                                | 1.51 (1.01 – 2.26)         | 0.043          |
| Conservative fluid-management                               | 67                                | 1.48 (1.02 – 2.15)         | 0.037          |
| <u>Fluid-Management</u><br><u>Logistic Regression Model</u> | <u>Total N</u><br><u>in Model</u> | <u>Odds Ratio (95% CI)</u> | <u>p-value</u> |
| Conservative fluid-management strategy (base model)         | 75                                | 4.03 (1.53 – 10.59)        | 0.005          |
| Adjusted for:                                               |                                   |                            |                |
| Age                                                         | 75                                | 4.15 (1.56 – 11.00)        | 0.004          |
| Gender                                                      | 75                                | 4.36 (1.60 – 11.85)        | 0.004          |
| Race                                                        | 75                                | 4.47 (1.66 – 12.01)        | 0.003          |
| History of heavy alcohol use <sup>†</sup>                   | 72                                | 5.46 (1.92 – 15.53)        | 0.001          |
| History of cerebrovascular disease <sup>†</sup>             | 73                                | 4.78 (1.77 – 12.91)        | 0.002          |
| Level of education                                          | 75                                | 4.45 (1.64 – 12.07)        | 0.003          |
| Time to testing                                             | 75                                | 4.00 (1.52 – 10.53)        | 0.005          |
| Psychiatric impairment                                      | 75                                | 3.84 (1.43 – 10.31)        | 0.008          |
| Mean arterial pressure (baseline) <sup>†</sup>              | 74                                | 4.88 (1.76 – 13.58)        | 0.002          |
| Vasopressor use (baseline)                                  | 75                                | 3.89 (1.47 – 10.28)        | 0.006          |
| Vasopressor use <sup>‡</sup>                                | 75                                | 4.28 (1.59 – 11.51)        | 0.004          |
| Central venous pressure <sup>‡</sup>                        | 75                                | 3.40 (1.21 – 9.58)         | 0.021          |
| Primary lung injury                                         | 75                                | 3.51 (1.24 – 9.94)         | 0.018          |
| PaO <sub>2</sub> <sup>†‡</sup>                              | 67                                | 3.35 (1.16 – 9.70)         | 0.026          |

\* Potential covariates were included in the multivariable logistic regression models if the variable was found to be associated with cognitive impairment in the univariate analyses ( $p < 0.20$ ) and to assess whether inclusion of the potential covariate altered the odds ratio for the candidate risk factor by  $> 10\%$ . Age, race, level of education, and time from enrollment to testing were forced into the models. See methods for details.

<sup>†</sup> History of heavy alcohol use was missing in 3 survivors; history of cerebrovascular disease was missing in 2 survivors; baseline mean arterial pressure missing in 1 survivor. On-study PaO<sub>2</sub> measurements were missing in 8 survivors.

‡ On-study values. Daily measurements on-study were summarized, at the subject level, as means.

§ For each 10-unit decrease in partial pressure of oxygen in arterial blood ( $\text{PaO}_2$ ), odds ratio for the development of cognitive impairment increases by 1.56 in the base model.



Figure E1.

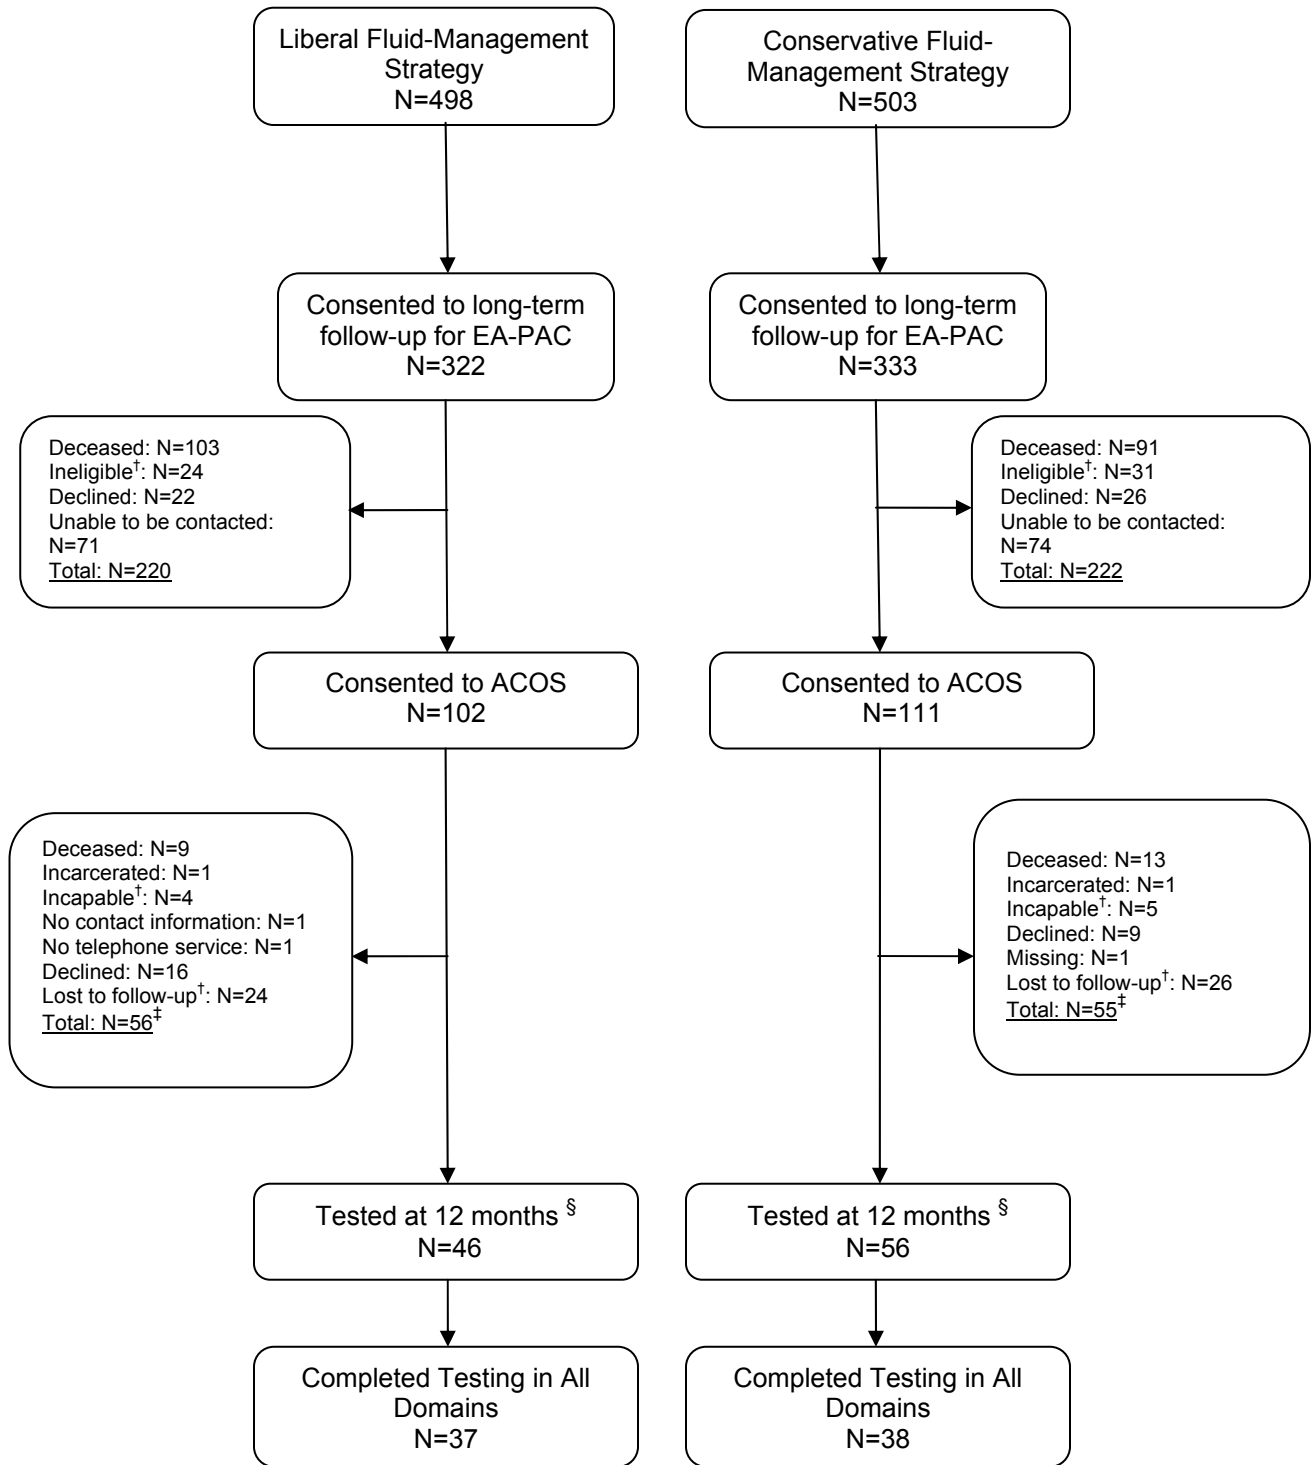

\* Of 1001 FACTT subjects who underwent randomization, 227 were ineligible for long-term follow-up as part of EA-PAC as no regulatory approval was in place and 119 refused consent (21).

† Subjects were categorized as ineligible if the time window to be tested had elapsed due to the regulatory halt, as incapable if self-determined or determined by a surrogate to be physically or mentally incapable of telephone-based neuropsychological testing, and as lost to follow-up if consent was obtained but the subject was not tested.

‡ Reasons for not being testing, in those who consented, are categorized initially as causes outside of investigator control and then as causes which may be potentially remediable by future investigators.

§ Of 52 subjects tested at 2 months (20 from liberal arm and 32 from conservative arm), 32 were re-tested at 12 months. Subjects were not required to undergo testing at 2 months to be tested at 12 months.
